# Supplementary material for: Prospective environmental risk assessment of nanocellulose for Europe
Source: Royal Society of Chemistry journal article supplement (doi:10.1039/c9en00472f), 2019-01-01

**Prospective environmental risk assessment of nanocellulose**

SUPPLEMENTARY INFORMATION

Table S1 Global and European production volume data (in tons), with Degree of Belief (DoB), used to model the production distribution of the base year 2015.

| Reference                           | DoB | Worldwide [t/a] | EU [t/a] |
|-------------------------------------|-----|-----------------|----------|
| Future Markets 2015                 | 80% | 610             | 201      |
| Miller 2014 (CelluForce forecast)   | 20% | 6106            | 2014     |
| Miller 2017 (Market Intel forecast) | 20% | 20684           | 6826     |

Table S2: Share of product categories in 2015 and 2021, using triangular distributions.

| Category                        | Description of NC use in product category               | 2015           |       |                | 2025           |       |                |
|---------------------------------|---------------------------------------------------------|----------------|-------|----------------|----------------|-------|----------------|
|                                 |                                                         | Lower boundary | Mean  | Upper boundary | Lower boundary | Mean  | Upper boundary |
| R&D                             | In pilot scale projects or for research purposes        | 0.375          | 0.750 | 1.000          | 0.288          | 0.575 | 0.863          |
| Paper & board                   | For printing paper, sheet paper, high strength board... | 0.022          | 0.089 | 0.134          | 0.074          | 0.149 | 0.223          |
| Packaging                       | As reinforcement agent in packaging                     | 0.000          | 0.045 | 0.067          | 0.037          | 0.075 | 0.112          |
| Filtration market               | For water filtration membrane technologies              | 0.007          | 0.034 | 0.051          | 0.029          | 0.057 | 0.086          |
| Rheology modifiers              | As thickener, suspension stabilizer                     | 0.007          | 1.000 | 0.441          | 0.005          | 0.011 | 0.016          |
| Textiles                        | In functional fabrics, anti-microbial textiles...       | 0.045          | 0.021 | 0.032          | 0.018          | 0.035 | 0.053          |
| Automotive                      | As natural fibre composites                             | 0.001          | 0.014 | 0.021          | 0.012          | 0.024 | 0.035          |
| Construction and building       | In concrete, asphalt...                                 | 0.001          | 0.014 | 0.021          | 0.012          | 0.023 | 0.035          |
| Coatings & films                | As barrier agent                                        | 0.001          | 0.010 | 0.015          | 0.008          | 0.016 | 0.025          |
| Aerogels                        | In insulation                                           | 0.001          | 0.003 | 0.005          | 0.003          | 0.005 | 0.008          |
| Drug delivery                   | In medical technology and treatments                    | 0.001          | 0.003 | 0.004          | 0.002          | 0.005 | 0.007          |
| Medical implants                |                                                         | 0.005          | 0.002 | 0.004          | 0.002          | 0.004 | 0.006          |
| Tissue engineering              |                                                         | 0.002          | 0.002 | 0.004          | 0.002          | 0.004 | 0.006          |
| Wound dressings                 |                                                         | 0.017          | 0.002 | 0.004          | 0.002          | 0.004 | 0.006          |
| Lateral flow immunoassay labels |                                                         | 0.001          | 0.002 | 0.004          | 0.002          | 0.004 | 0.006          |
| Printed & flexible electronics  | In displays, solar or fuel cells, sensors...            | 0.011          | 0.002 | 0.002          | 0.001          | 0.003 | 0.004          |
| Rubber and tire additives       | As additive in car tires                                | 0.001          | 0.002 | 0.002          | 0.001          | 0.003 | 0.004          |
| Colorants                       | In paints, textiles, food, cosmetics...                 | 0.022          | 0.002 | 0.002          | 0.001          | 0.003 | 0.004          |
| Aerospace and aviation          | As natural fibre composites                             | 0.001          | 0.000 | 0.001          | 0.000          | 0.001 | 0.001          |

Major assumptions for numbers presented in Table 1:

Due to the lack of release data relating to nanocellulose-containing products available in the literature, modelling the release of NC during each application's Use and EoL phases required to use data from studies of other nanomaterial-containing products. Therefore, we assume in our work that the matrix into which the nanomaterial is incorporated, and the specific characteristics of the application play a decisive role, rather than the nanomaterial under consideration. Taking the product category 'Textiles' as an example, we assume that the share of nanomaterials released during the Use phase and EoL phase will be the same regardless of whether considering nanocellulose-containing textile or nano-TiO<sub>2</sub>-containing textile. Similarly, we assume that allocation to environmental compartments after the Use release and allocation to waste compartments after the EoL release will depend on the considered application, not the nanomaterial.

Table S3: Summary of the waste management. The various waste categories where NC flows into at the EoL of an application will end up in technical compartments, after a number of steps. First, each waste category will either go to Landfill, MMSW, or Sorting. Waste entering MMSW will go into Landfill and WIP. Waste entering Sorting will be treated differently based on the initial waste category, and will end up in Landfill, WIP, Export, Reuse, Reprocessing, or Disposal. Waste entering Disposal will in turn go to Landfill and WIP, in the same share as for MMSW.

| Waste category | Allocation to waste compartments |       |          |       |         | Allocation of Sorting to waste compartments |     |        |       |              |          | Allocation of Disposal to waste compartments |       |
|----------------|----------------------------------|-------|----------|-------|---------|---------------------------------------------|-----|--------|-------|--------------|----------|----------------------------------------------|-------|
|                | Landfill                         | MMSW  | Landfill | WIP   | Sorting | Landfill                                    | WIP | Export | Reuse | Reprocessing | Disposal | Landfill                                     | WIP   |
| CDW            | 0.21                             |       |          |       | 0.79    | 0.72                                        |     |        |       | 0.28         |          |                                              |       |
| WEEE           |                                  | 0.51  | 0.448    | 0.552 | 0.49    |                                             |     | 0.23   |       | 0.27412      | 0.49588  | 0.448                                        | 0.552 |
| TextW          |                                  | 0.675 | 0.448    | 0.552 | 0.325   |                                             |     | 0.4    | 0.1   | 0.35         | 0.15     | 0.448                                        | 0.552 |
| PackW          |                                  | 0.287 | 0.448    | 0.552 | 0.713   |                                             |     |        |       | 0.56         | 0.44     | 0.448                                        | 0.552 |
| PaperW         |                                  | 0.093 | 0.448    | 0.552 | 0.907   |                                             |     |        |       | 0.9188       | 0.0812   | 0.448                                        | 0.552 |
| MedW           |                                  | 0.8   | 0.448    | 0.552 | 0.2     |                                             | 1   |        |       |              |          |                                              |       |
| AviW           | 0.15                             |       |          |       | 0.85    |                                             |     |        |       | 1            |          |                                              |       |
| AutoW          | 0.114                            |       |          |       | 0.886   |                                             |     | 0.3    |       | 0.7          |          |                                              |       |

Table S4: Model flows for 2015 and 2021. Mean, Q50, Q15, and Q85 values, in tons.

| Flows                                | 2015 (tons) |        |        |         | 2025 (tons) |         |         |          |
|--------------------------------------|-------------|--------|--------|---------|-------------|---------|---------|----------|
|                                      | Mean        | Q50    | Q15    | Q85     | Mean        | Q50     | Q15     | Q85      |
| PackW to Sorting_PackW               | 16.99       | 12.91  | 4.38   | 30.70   | 244.21      | 192.56  | 69.21   | 434.18   |
| AviW to Landfill                     | 0.00        | 0.00   | 0.00   | 0.00    | 0.00        | 0.00    | 0.00    | 0.00     |
| AviW to Sorting_AviW                 | 0.00        | 0.00   | 0.00   | 0.00    | 0.00        | 0.00    | 0.00    | 0.00     |
| AutoW to Landfill                    | 0.56        | 0.45   | 0.17   | 0.96    | 8.56        | 6.51    | 2.69    | 14.57    |
| AutoW to Sorting_AutoW               | 4.33        | 3.56   | 1.42   | 7.38    | 66.47       | 51.81   | 22.12   | 111.04   |
| PaperW to Sorting_PaperW             | 89.15       | 63.87  | 19.79  | 167.85  | 1544.54     | 1087.12 | 331.81  | 2914.80  |
| PaperW to MMSW                       | 9.14        | 6.36   | 1.93   | 17.07   | 157.76      | 109.38  | 33.47   | 295.43   |
| MedW to MMSW                         | 4.82        | 2.86   | 1.06   | 8.83    | 119.04      | 47.44   | 20.42   | 207.75   |
| MedW to Sorting_MedW                 | 1.21        | 0.70   | 0.26   | 2.21    | 29.79       | 11.67   | 4.83    | 51.80    |
| Sorting_PackW to Reprocessing        | 9.52        | 7.10   | 2.41   | 17.16   | 136.70      | 105.78  | 38.23   | 244.19   |
| Sorting_PackW to Sorting_Disposal    | 7.47        | 5.56   | 1.83   | 13.55   | 107.51      | 82.08   | 29.08   | 193.07   |
| Sorting_WEEE to WEEE_NotExported     | 0.22        | 0.18   | 0.07   | 0.38    | 2.94        | 2.47    | 1.08    | 4.90     |
| Sorting_WEEE to Export               | 0.05        | 0.04   | 0.01   | 0.09    | 0.67        | 0.53    | 0.22    | 1.14     |
| Sorting_TextW to Sorting_Disposal    | 1.15        | 0.55   | 0.14   | 2.28    | 27.66       | 12.93   | 3.31    | 54.24    |
| Sorting_TextW to TextW_Resorting     | 3.70        | 1.77   | 0.45   | 7.30    | 89.73       | 43.09   | 10.74   | 177.64   |
| Sorting_TextW to Export              | 3.17        | 1.52   | 0.38   | 6.28    | 77.22       | 35.65   | 9.18    | 151.58   |
| Sorting_TextW to Textiles_Use        | 0.65        | 0.29   | 0.07   | 1.28    | 15.67       | 6.77    | 1.70    | 30.18    |
| Sorting_CDW to Sorting_Disposal      | 0.56        | 0.41   | 0.14   | 1.01    | 7.90        | 5.94    | 2.21    | 14.05    |
| Sorting_CDW to Sorting_CDW_Wood      | 0.83        | 0.61   | 0.21   | 1.51    | 11.89       | 8.98    | 3.29    | 21.13    |
| Sorting_CDW to Sorting_CDW_Mineral   | 1.38        | 1.03   | 0.35   | 2.50    | 19.77       | 15.11   | 5.57    | 35.46    |
| Sorting_AviW to Reprocessing         | 0.00        | 0.00   | 0.00   | 0.00    | 0.00        | 0.00    | 0.00    | 0.00     |
| Sorting_AutoW to Reprocessing        | 3.21        | 2.64   | 1.05   | 5.47    | 49.54       | 38.36   | 16.46   | 82.92    |
| Sorting_AutoW to Export              | 1.11        | 0.90   | 0.35   | 1.91    | 16.93       | 12.83   | 5.42    | 28.06    |
| Sorting_PaperW to Reprocessing       | 81.91       | 58.39  | 18.28  | 154.02  | 1418.83     | 997.30  | 304.36  | 2668.80  |
| Sorting_PaperW to Sorting_Disposal   | 7.24        | 5.05   | 1.56   | 13.53   | 125.71      | 86.44   | 26.61   | 236.20   |
| Sorting_MedW to WIP                  | 1.21        | 0.70   | 0.26   | 2.21    | 29.79       | 11.67   | 4.83    | 51.80    |
| WEEE_NotExported to Reprocessing     | 0.08        | 0.06   | 0.02   | 0.14    | 1.05        | 0.86    | 0.37    | 1.75     |
| WEEE_NotExported to Sorting_Disposal | 0.14        | 0.11   | 0.04   | 0.25    | 1.89        | 1.58    | 0.69    | 3.15     |
| TextW_Resorting to Reprocessing      | 1.78        | 0.81   | 0.21   | 3.48    | 43.14       | 20.38   | 5.07    | 85.52    |
| TextW_Resorting to Sorting_Disposal  | 1.93        | 0.90   | 0.23   | 3.78    | 46.59       | 21.46   | 5.29    | 91.12    |
| Sorting_CDW_Mineral to Landfill      | 1.15        | 0.86   | 0.29   | 2.06    | 16.45       | 12.45   | 4.59    | 29.11    |
| Sorting_CDW_Mineral to Reprocessing  | 0.23        | 0.14   | 0.03   | 0.44    | 3.32        | 2.09    | 0.50    | 6.35     |
| Sorting_CDW_Wood to Sorting_Disposal | 0.83        | 0.61   | 0.21   | 1.51    | 11.89       | 8.98    | 3.29    | 21.13    |
| Sorting_Disposal to Landfill         | 8.67        | 7.21   | 2.84   | 14.79   | 147.81      | 120.68  | 47.87   | 256.92   |
| Sorting_Disposal to WIP              | 10.64       | 8.85   | 3.49   | 18.17   | 181.34      | 148.17  | 58.80   | 315.76   |
| WIP to Burning                       | 807.30      | 159.30 | 104.63 | 2207.07 | 10147.38    | 2441.98 | 1022.01 | 20104.50 |
| Burning to Elimination               | 774.99      | 153.80 | 99.68  | 2066.40 | 9743.99     | 2318.38 | 963.28  | 18909.39 |
| Burning to Remains_burning           | 32.31       | 0.03   | 0.00   | 27.40   | 403.39      | 0.00    | 0.00    | 355.56   |
| Remains_burning to Bottom ash        | 26.03       | 0.02   | 0.00   | 21.88   | 326.19      | 0.00    | 0.00    | 287.46   |
| Remains_burning to Flyash            | 6.28        | 0.00   | 0.00   | 5.17    | 77.20       | 0.00    | 0.00    | 67.79    |
| Bottom ash to Landfill               | 14.65       | 0.01   | 0.00   | 12.13   | 183.99      | 0.00    | 0.00    | 160.11   |
| Bottom ash to Reprocessing           | 11.39       | 0.01   | 0.00   | 9.58    | 142.19      | 0.00    | 0.00    | 121.25   |
| Flyash to Filterash                  | 6.27        | 0.00   | 0.00   | 5.17    | 77.19       | 0.00    | 0.00    | 67.78    |
| Flyash to Wastewater                 | 0.00        | 0.00   | 0.00   | 0.00    | 0.01        | 0.00    | 0.00    | 0.01     |
| Flyash to Air                        | 0.00        | 0.00   | 0.00   | 0.00    | 0.00        | 0.00    | 0.00    | 0.00     |
| Filterash to Landfill                | 6.27        | 0.00   | 0.00   | 5.17    | 77.19       | 0.00    | 0.00    | 67.78    |
| Wastewater to NoSewageSystem         | 15.77       | 4.26   | 2.17   | 36.33   | 260.01      | 79.74   | 30.84   | 465.01   |
| Wastewater to SewageSystem           | 94.60       | 25.01  | 13.81  | 233.75  | 1547.06     | 474.85  | 194.33  | 2871.52  |
| NoSewageSystem to Surfacewater       | 3.38        | 0.91   | 0.47   | 7.79    | 55.72       | 17.09   | 6.61    | 99.64    |
| NoSewageSystem to OnsiteTreat        | 12.39       | 3.34   | 1.71   | 28.55   | 204.29      | 62.66   | 24.23   | 365.36   |
| SewageSystem to Subsurface           | 6.15        | 1.65   | 0.85   | 14.41   | 100.59      | 30.49   | 11.93   | 178.89   |
| SewageSystem to STPOverflow          | 3.02        | 0.82   | 0.42   | 6.88    | 49.46       | 15.07   | 5.93    | 88.39    |
| SewageSystem to Surfacewater         | 1.61        | 0.43   | 0.22   | 3.67    | 26.27       | 8.02    | 3.10    | 46.90    |
| SewageSystem to WWTP                 | 83.83       | 22.18  | 12.21  | 206.46  | 1370.75     | 420.83  | 172.28  | 2547.46  |
| OnsiteTreat to TreatIOnsite          | 12.39       | 3.34   | 1.71   | 28.55   | 204.29      | 62.66   | 24.23   | 365.36   |
| WWTP to TreatIII                     | 68.56       | 18.09  | 9.97   | 168.62  | 1123.14     | 342.47  | 139.40  | 2079.15  |
| WWTP to TreatII                      | 14.68       | 3.97   | 2.02   | 33.33   | 238.02      | 72.64   | 28.62   | 429.29   |
| WWTP to TreatI                       | 0.58        | 0.16   | 0.08   | 1.37    | 9.59        | 2.93    | 1.13    | 17.75    |
| TreatI to STPsludge                  | 0.57        | 0.15   | 0.08   | 1.33    | 9.38        | 2.86    | 1.11    | 17.24    |
| TreatI to STPeffluent                | 0.01        | 0.00   | 0.00   | 0.03    | 0.21        | 0.06    | 0.01    | 0.32     |
| TreatII to STPsludge                 | 14.36       | 3.89   | 1.97   | 32.39   | 232.78      | 71.12   | 28.02   | 418.59   |
| TreatII to STPeffluent               | 0.32        | 0.09   | 0.02   | 0.64    | 5.24        | 1.45    | 0.32    | 8.52     |
| TreatIII to STPsludge                | 67.04       | 17.72  | 9.76   | 164.69  | 1098.90     | 334.03  | 136.38  | 2026.69  |
| TreatIII to STPeffluent              | 1.52        | 0.43   | 0.12   | 3.01    | 24.24       | 7.01    | 1.55    | 37.61    |
| TreatIOnsite to OnsiteSludge         | 12.11       | 3.26   | 1.67   | 27.80   | 199.79      | 61.19   | 23.59   | 358.75   |
| TreatIOnsite to Subsurface           | 0.27        | 0.08   | 0.02   | 0.54    | 4.51        | 1.23    | 0.26    | 6.93     |
| STPOverflow to Surfacewater          | 3.02        | 0.82   | 0.42   | 6.88    | 49.46       | 15.07   | 5.93    | 88.39    |
| STPeffluent to Surfacewater          | 1.86        | 0.52   | 0.19   | 3.80    | 29.68       | 8.78    | 2.53    | 48.78    |
| STPsludge to Landfill                | 8.41        | 2.24   | 1.15   | 19.45   | 136.87      | 41.58   | 16.49   | 247.59   |
| STPsludge to WIP                     | 25.74       | 6.99   | 3.54   | 58.70   | 423.66      | 128.30  | 49.96   | 751.14   |
| STPsludge to Sludge treated soil     | 47.82       | 12.65  | 6.83   | 114.29  | 780.54      | 241.28  | 96.39   | 1444.41  |

Table S5: Aquatic toxicity data for nanocellulose.

| Author             | Dose descriptor | Test organism        | Concentration (µg/l) | Exposure time (h) | AF time | AF no-effect | Species sensitivity (µg/l) |
|--------------------|-----------------|----------------------|----------------------|-------------------|---------|--------------|----------------------------|
| Harper et al. 2016 | NOEC            | <i>D.erio</i>        | 250000               | 120               | 10      | 1            | 10000                      |
| Harper et al. 2016 | HONEC           | <i>D.erio</i>        | 172000               | 120               | 10      | 1            | 172000                     |
| Harper et al. 2016 | HONEC           | <i>D.erio</i>        | 200000               | 120               | 10      | 1            | 200000                     |
| Harper et al. 2016 | HONEC           | <i>D.erio</i>        | 200000               | 120               | 10      | 1            | 200000                     |
| Harper et al. 2016 | HONEC           | <i>D.erio</i>        | 200000               | 120               | 10      | 1            | 200000                     |
| Harper et al. 2016 | HONEC           | <i>D.erio</i>        | 200000               | 120               | 10      | 1            | 200000                     |
| Harper et al. 2016 | HONEC           | <i>D.erio</i>        | 200000               | 120               | 10      | 1            | 200000                     |
| Harper et al. 2016 | HONEC           | <i>D.erio</i>        | 200000               | 120               | 10      | 1            | 200000                     |
| Harper et al. 2016 | HONEC           | <i>D.erio</i>        | 200000               | 120               | 10      | 1            | 200000                     |
| Harper et al. 2016 | HONEC           | <i>D.erio</i>        | 250000               | 120               | 10      | 1            | 250000                     |
| Harper et al. 2016 | HONEC           | <i>D.erio</i>        | 250000               | 120               | 10      | 1            | 250000                     |
| Kovacs et al. 2010 | EC50            | <i>H.attenuata</i>   | na                   | 96                | 10      | 10           | 60000                      |
| Kovacs et al. 2010 | IC25            | <i>P.subcapitata</i> | na                   | 72                | 1       | 10           | 120000                     |
| Kovacs et al. 2010 | IC25            | <i>C.dubia</i>       | 1000000              | 48                | 10      | 10           | 200000                     |
| Kovacs et al. 2010 | LC50            | <i>C.dubia</i>       | 5000000              | 48                | 10      | 10           | 300000                     |
| Kovacs et al. 2010 | EC50            | <i>H.attenuata</i>   | na                   | 96                | 10      | 10           | 360000                     |
| Kovacs et al. 2010 | IC25            | <i>A.fischeri</i>    | na                   | 0.25              | 10      | 10           | 460000                     |
| Kovacs et al. 2010 | LC50            | <i>C.dubia</i>       | 1000000              | 48                | 10      | 10           | 1000000                    |
| Kovacs et al. 2010 | IC25            | <i>C.dubia</i>       | 1000000              | 48                | 10      | 10           | 1000000                    |
| Kovacs et al. 2010 | IC25            | <i>C.dubia</i>       | 1000000              | 48                | 10      | 10           | 1000000                    |
| Kovacs et al. 2010 | IC25            | <i>C.dubia</i>       | 1000000              | 48                | 10      | 10           | 1000000                    |
| Kovacs et al. 2010 | IC25            | <i>C.dubia</i>       | 1000000              | 48                | 10      | 10           | 1000000                    |
| Kovacs et al. 2010 | LC50            | <i>D.magna</i>       | 1000000              | 48                | 10      | 10           | 1000000                    |
| Kovacs et al. 2010 | LC50            | <i>D.magna</i>       | 1000000              | 48                | 10      | 10           | 1000000                    |
| Kovacs et al. 2010 | LC50            | <i>O.mykiss</i>      | 1000000              | 96                | 10      | 10           | 1000000                    |
| Kovacs et al. 2010 | LC50            | <i>O.mykiss</i>      | 1000000              | 96                | 10      | 10           | 1000000                    |
| Kovacs et al. 2010 | LC50            | <i>O.mykiss</i>      | 1000000              | 96                | 10      | 10           | 1000000                    |
| Kovacs et al. 2010 | LC50            | <i>C.dubia</i>       | 5000000              | 48                | 10      | 10           | 1400000                    |
| Kovacs et al. 2010 | IC25            | <i>C.dubia</i>       | 2000000              | 48                | 10      | 10           | 1400000                    |
| Kovacs et al. 2010 | LC50            | <i>C.dubia</i>       | 5000000              | 48                | 10      | 10           | 1600000                    |



|                        |       |                      |          |     |    |    |         |
|------------------------|-------|----------------------|----------|-----|----|----|---------|
| 2018                   |       |                      |          |     |    |    |         |
| Ogonowski et al. 2018  | HONEC | <i>D.magna</i>       | 2060000  | 48  | 10 | 1  | 2060000 |
| Ong et al. 2017        | EC50  | <i>A.fischeri</i>    | 100000   | 0.5 | 10 | 10 | 100000  |
| Ong et al. 2017        | EC50  | <i>A.fischeri</i>    | 100000   | 0.5 | 10 | 10 | 100000  |
| Ong et al. 2017        | NOEC  | <i>P.subcapitata</i> | 2800000  | 72  | 1  | 1  | 175000  |
| Ong et al. 2017        | NOEC  | <i>P.subcapitata</i> | 1200000  | 72  | 1  | 1  | 300000  |
| Ong et al. 2017        | LC50  | <i>D.rerio</i>       | 2000000  | 120 | 10 | 10 | 2000000 |
| Ong et al. 2017        | LC50  | <i>D.rerio</i>       | 2000000  | 120 | 10 | 10 | 2000000 |
| Ong et al. 2017        | NOEC  | <i>D.magna</i>       | 6000000  | 48  | 10 | 1  | 6000000 |
| Ong et al. 2017        | NOEC  | <i>D.magna</i>       | 14000000 | 48  | 10 | 1  | 7000000 |
| Vartiainen et al. 2011 | NOEC  | <i>A.fischeri</i>    | 2500000  | 0.5 | 10 | 1  | 300000  |
| Vartiainen et al. 2011 | NOEC  | <i>A.fischeri</i>    | 2500000  | 0.5 | 10 | 1  | 2500000 |

Figure S1: PNEC distribution resulting from taking the 5<sup>th</sup> percentile of the PSSD in freshwater.

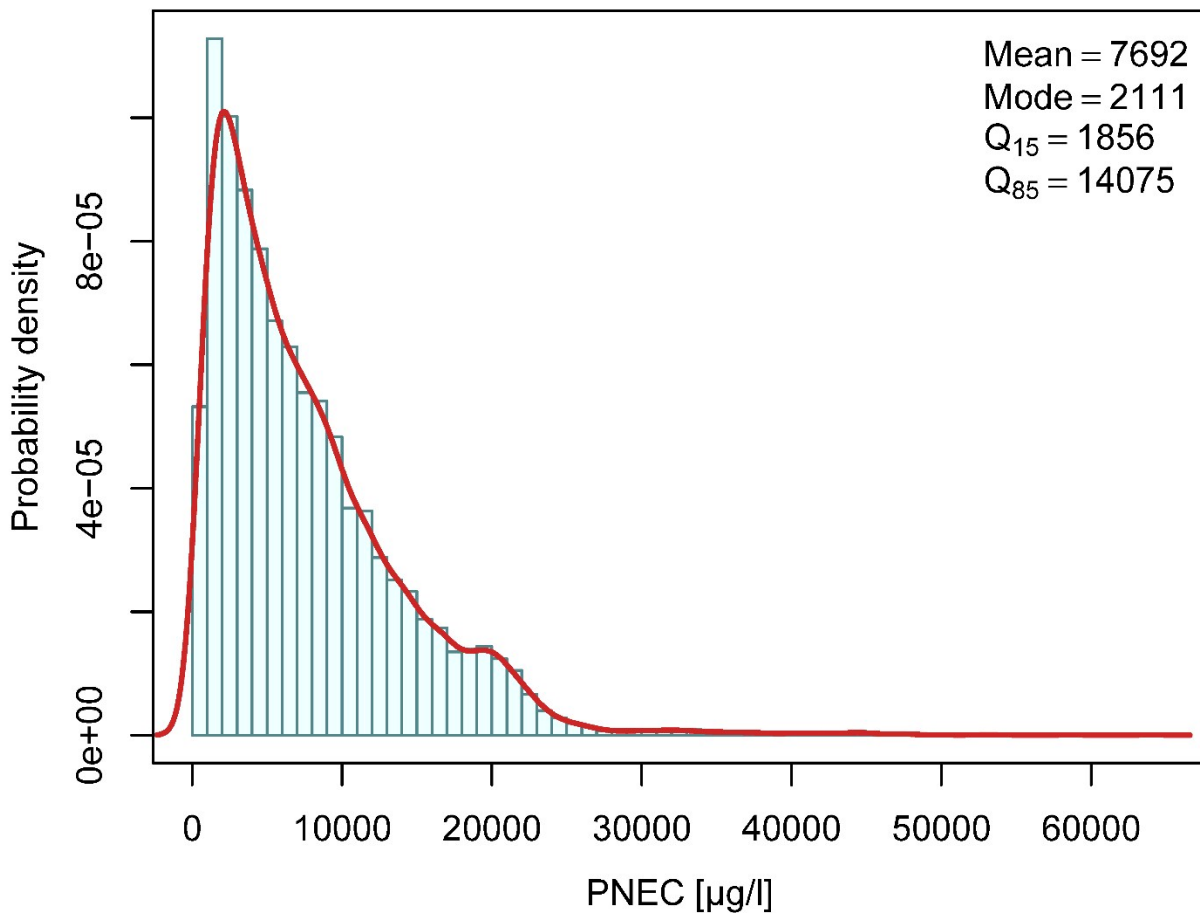



Figures S2a and S2b: Risk characterization ratio distribution for nanocellulose in European surface water in 2015 (top) and 2021 (bottom).

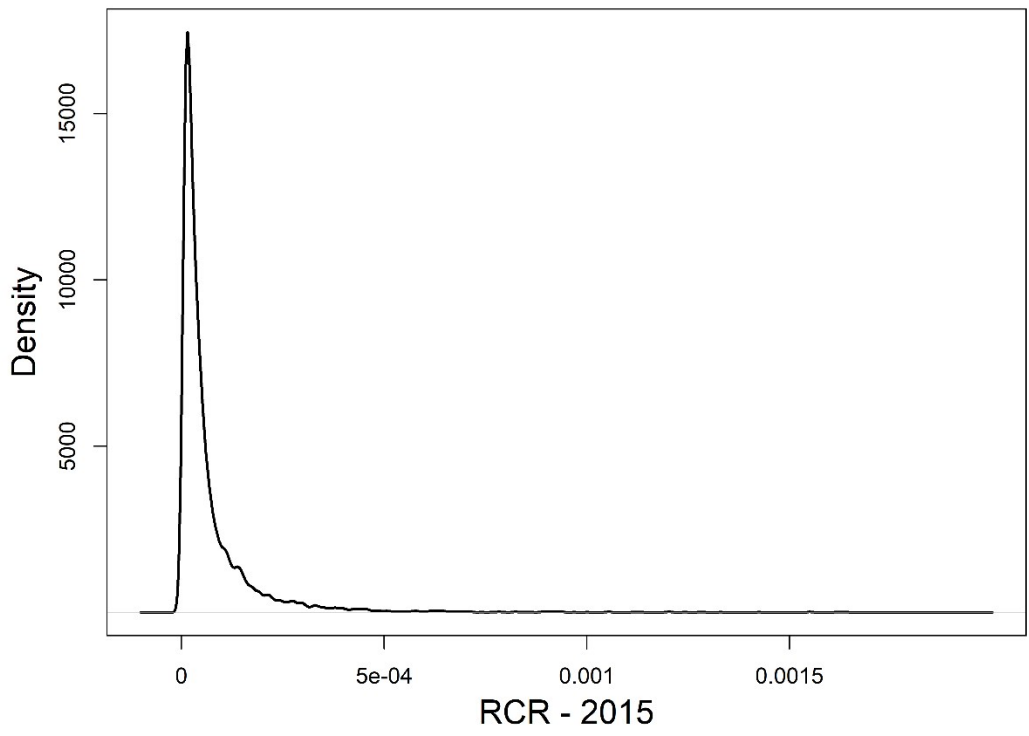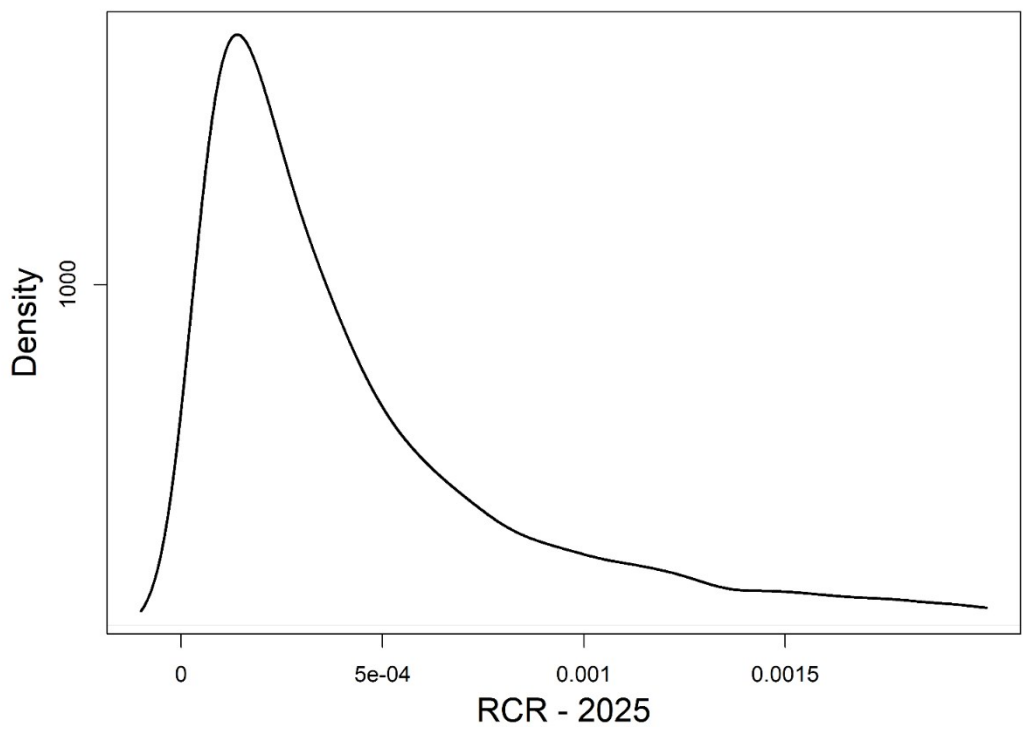

Supplement: c9en00472f1.pdf [file c9en00472f1.pdf]
